# Supplementary material
Source: publisher figshare collection journal article supplement (https://sage.figshare.com/ndownloader/files/15254864)
Supplement: Supplementary file 1 [file 15254864]

## Appendix 1: Interview Protocol

Table 2. Semi-structured interview questions.

|                                                                                                                                                                                                 |
|-------------------------------------------------------------------------------------------------------------------------------------------------------------------------------------------------|
| 1. Can you explain to me how it is for you to live with MS?                                                                                                                                     |
| 2. What are the main problems for you at this time?                                                                                                                                             |
| 3. Can you tell me who is currently involved in caring for you?                                                                                                                                 |
| 4. What is the most important thing for you, in terms of your present and future care?                                                                                                          |
| 5. What do you like about seeing your neurologist?                                                                                                                                              |
| 6. What do you dislike about seeing your neurologist?                                                                                                                                           |
| 7. Overall, do you think seeing your neurologist is useful, at this stage of your disease?                                                                                                      |
| 8. What are the most important things that you want your neurologist to do for you, at this stage of your disease? In other words, what role do you want your neurologist to play in your care? |
| 9. What could be improved about your overall care?                                                                                                                                              |
| 10. Have you heard about the term “palliative care”? What does it mean to you?                                                                                                                  |
